# Supplementary material
Source: PubMed Central journal article supplement (PMC4251497)
Supplement: bi501109s_si_001.pdf [file bi501109s_si_001.pdf]

## Supporting Information

### Phenylalanine Binding Is Linked to Dimerization of the Regulatory Domain of Phenylalanine Hydroxylase

Shengnan Zhang, Kenneth M. Roberts, Paul F. Fitzpatrick\*

Department of Biochemistry, University of Texas Health Science Center, San Antonio, TX  
78229

#### Protein expression and purification

The expression and purification of RDPheH from rat were modified from the method described previously (1) in that a gel filtration step (Superdex 200 10/300 GL) was added after the HisTrap FF column (5 ml, GE Healthcare Life Science, Piscataway, NJ). The expression vector for the N-terminal 24 residue deletion mutant RDPheH<sub>25-117</sub> was produced from the plasmid used to express RDPheH using the QuikChange Mutagenesis protocol (Agilent Technologies). The oligonucleotides used as primers were 5'-ccgcgcgccagccatattgaagacaactcca-3' and 5'-tggagttgtcttcaatatggctgccgcgccc-3'. RDPheH<sub>25-117</sub> was expressed in *E. coli* BL21 (DE3) and purified using the same protocol as for RDPheH. The purities of all protein preparations were greater than 95% based on polyacrylamide gel electrophoresis in the presence of sodium dodecyl sulfate. Protein kinase A was purified from beef heart using the protocol of Flockhart and Corbin (2). Phosphorylation of RDPheH by protein kinase A and purification of the phosphorylated protein were performed as previously described (3).

#### Analytical ultracentrifugation

The sedimentation velocity experiments were performed in the Center for Macromolecular Interactions at the University of Texas Health Science Center in San Antonio. A Beckman Coulter XL-I ultracentrifuge (Beckman Instruments, CA, USA) with an An60Ti 4-hole rotor was used at 60,000 rpm at 20 °C. All AUC samples were prepared in 50 mM phosphate, 100 mM NaCl, at pH 8.0. Protein concentrations were monitored at 280 or 230 nm. Ultrascan III (4) was used for van Holde-Weischet analyses of the AUC data (5). The standard  $c(s)$  model of SEDFIT was used to generate  $c(s)$  distributions of each SV experiment. The values for the weighted-average sedimentation coefficient ( $s_w$ ) were determined by integration of the  $c(s)$  distribution between 1 and 3 S.

#### KinTek Explorer analysis

KinTek Explorer (6) (KinTek Corp, Austin, TX) was used for global analysis of the effects of phenylalanine binding on dimerization and to evaluate different binding models. Several variations on the model in Scheme S1 were considered. The expected  $s_w$  values were calculated using eq S1, where  $s_1$  and  $s_2$  are the sedimentation coefficients of the monomer and dimer, respectively, and  $M$  and  $D$  are the molar concentrations of the monomer and the dimer, respectively. The calculated values for  $s_w$  were treated as equilibrium values reached after reaction times from 5 - 60 s. Each forward rate constant was fixed at an arbitrarily high value sufficient that the equilibrium constant was determined only by the value of the respective reverse rate constant. As a result, fitting the dissociation rate constants ( $k_{-1}$ ,  $k_{-2}$  and  $k_{-3}$ ) also yielded the corresponding equilibrium constants ( $K_n$ ), including the relative errors, from  $k_n/k_{-n}$ ; the values for  $s_1$  and  $s_2$  were also allowed to float in these calculations. The statistical confidences for the best-fit values for the equilibrium constants were determined using the FitSpace module of KinTek Explorer (7). Reported confidence intervals represent values for each parameter for which the best fit has a sum square error 30% greater than the minimum global error.

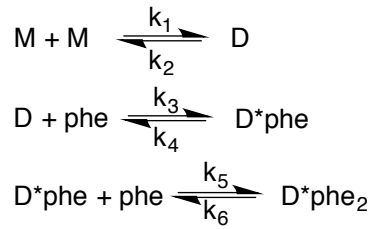

**Scheme S1**

$$s_w = \frac{s_1 * M + s_2 * 2 * \sum(DPhe_n)}{M + 2 * \sum(DPhe_n)} \quad (2)$$

## References

1. Li, J., Ilangoan, U., Daubner, S. C., Hinck, A. P., and Fitzpatrick, P. F. (2011) Direct evidence for a phenylalanine site in the regulatory domain of phenylalanine hydroxylase, *Arch Biochem Biophys* 505, 250-255.
2. Flockhart, D. A., and Corbin, J. D. (1984) Preparation of the catalytic subunit of cAMP-dependent protein kinase. , In *In Brain Receptor Methodologies, Part A (Maranos, P. J., Campbell, I. C. & Cohen, R. M., eds.)*, pp 209-215, Academic Press, New York.
3. Li, J., and Fitzpatrick, P. F. (2013) Regulation of phenylalanine hydroxylase: Conformational changes upon phosphorylation detected by H/D exchange and mass spectrometry, *Archives of Biochemistry and Biophysics* 535, 115-119.
4. Demeler, B. (2005) UltraScan-a comprehensive data analysis software package for analytical ultracentrifugation experiments, In *In Modern Analytical Ultracentrifugation: Techniques and Methods (D.J. Scott, S.E. Harding, and A.J. Rowe, eds.)*, pp 210-229, Royal Society of Chemistry, London.
5. Demeler, B., and van Holde, K. E. (2004) Sedimentation velocity analysis of highly heterogeneous systems, *Anal Biochem* 335, 279-288.
6. Johnson, K. A. (2009) Fitting enzyme kinetic data with KinTek Global Kinetic Explorer, *Methods Enzymol* 467, 601-626.
7. Johnson, K. A., Simpson, Z. B., and Blom, T. (2009) FitSpace Explorer: An algorithm to evaluate multidimensional parameter space in fitting kinetic data, *Anal. Biochem.* 387, 30-41.
